# Supplementary material for: Integrating Distribution-Based and Anchor-Based Techniques to Identify Minimal Important Change for the Tinnitus Functional Index (TFI) Questionnaire
Source: MDPI journal article supplement (doi:10.3390/brainsci12060726), 2022-05-31
Supplement: s1 [file s1]

**Table S1.** Descriptive statistics for the TFI, TFI-22 and subscales.

|           | Scale            | Range  | T0       |             | T1       |             | T2       |             | T3       |             |
|-----------|------------------|--------|----------|-------------|----------|-------------|----------|-------------|----------|-------------|
|           |                  |        | <i>n</i> | Mean (SD)   |
| Grading   | TFI              |        | 255      | 52.7 (21.7) | 196      | 44.7 (22.4) | 175      | 43.0 (23.7) | 165      | 42.9 (25.5) |
|           | No problem       | 0–7    | –        | –           | –        | –           | –        | –           | –        | –           |
|           | Small problem    | 7–28   | 38       | 20.6 (6.2)  | 32       | 21.2 (10.1) | 28       | 19.1 (10.0) | 28       | 21.8 (15.8) |
|           | Moderate problem | 29–47  | 72       | 38.5 (50.2) | 53       | 33.3 (13.4) | 49       | 33.7 (15.8) | 46       | 32.0 (19.0) |
|           | Big problem      | 48–65  | 70       | 56.5 (5.5)  | 53       | 47.2 (15.3) | 46       | 42.9 (18.6) | 44       | 43.6 (20.8) |
|           | Very big problem | 66–100 | 75       | 79.1 (10.0) | 58       | 65.9 (20.0) | 52       | 64.6 (21.3) | 47       | 65.6 (22.0) |
| Grading   | TFI22            |        | 255      | 54.1 (22.4) | 195      | 54.1 (23.2) | 175      | 43.3 (24.3) | 164      | 42.8 (25.9) |
|           | No problem       | 0–7    | –        | –           | –        | –           | –        | –           | –        | –           |
|           | Small problem    | 7–28   | 31       | 18.4 (5.4)  | 26       | 19.9 (10.6) | 24       | 17.7 (11.2) | 24       | 19.2 (14.6) |
|           | Moderate problem | 29–47  | 80       | 38.9 (6.4)  | 59       | 32.1 (13.5) | 53       | 32.3 (15.8) | 50       | 30.6 (18.6) |
|           | Big problem      | 48–65  | 81       | 60.0 (6.7)  | 63       | 49.7 (15.6) | 57       | 46.9 (18.8) | 54       | 45.2 (19.5) |
|           | Very big problem | 66–100 | 63       | 83.4 (8.5)  | 48       | 69.2 (20.7) | 41       | 67.3 (22.6) | 37       | 70.9 (21.6) |
| Subscales | INTR             |        | 251      | 62.3 (22.0) | 191      | 52.3 (23.8) | 163      | 50.7 (25.2) | 157      | 48.1 (25.8) |
|           | SOC              |        | 251      | 64.5 (21.7) | 196      | 54.4 (24.6) | 173      | 51.0 (25.7) | 164      | 52.1 (27.4) |
|           | COG              |        | 255      | 47.1 (26.7) | 193      | 41.0 (26.1) | 175      | 39.3 (27.1) | 165      | 38.2 (28.3) |
|           | SLP              |        | 253      | 55.6 (31.9) | 196      | 45.2 (30.6) | 175      | 42.4 (31.1) | 164      | 40.8 (33.2) |
|           | AUD              |        | 254      | 42.6 (30.7) | 194      | 40.7 (28.4) | 175      | 40.7 (28.7) | 165      | 44.2 (30.6) |
|           | REL              |        | 254      | 64.4 (27.8) | 195      | 53.6 (26.7) | 173      | 51.4 (28.3) | 163      | 50.9 (29.4) |
|           | QOL              |        | 255      | 39.9 (29.5) | 196      | 33.7 (27.3) | 175      | 33.8 (27.8) | 165      | 34.2 (29.0) |
|           | EMO              |        | 255      | 49.4 (30.4) | 195      | 39.9 (29.6) | 175      | 37.7 (30.0) | 165      | 37.3 (30.9) |

The maximum score is 100. SD = Standard Deviation; T0 = baseline; T1 = 3-month follow-up, T2 = 6-month follow-up, T3 = 9-month follow-up. – = no data

**Table S2.** Mean (SD) TFI, TFI-22 global and subscale scores according to three Clinical Global Impression (CGI) categories and Minimal Clinically Important Difference (MCID) for ‘improved’ and ‘worsened’ categories for each subscale at follow-up administrations.

|        | CGI-3     | T1       |              |       | T2       |              |       | T3       |               |       |
|--------|-----------|----------|--------------|-------|----------|--------------|-------|----------|---------------|-------|
|        |           | <i>n</i> | Mean (SD)    | MCID  | <i>n</i> | Mean (SD)    | MCID  | <i>n</i> | Mean (SD)     | MCID  |
| TFI-25 | Improved  | 69       | –16.8 (15.9) | –12.7 | 67       | –19.4 (16.1) | –12.3 | 59       | –19.9 (19.2)  | –10.8 |
|        | No change | 101      | –4.1 (12.0)  |       | 67       | –7.1 (13.5)  |       | 48       | –9.1 (12.7)   |       |
|        | Worsened  | 26       | 1.9 (11.8)   | 6     | 41       | 2.9 (14.7)   | 10    | 58       | 2.9 (16.7)    | 12    |
| TFI-22 | Improved  | 69       | –17.9 (16.8) | –13.0 | 67       | –20.9 (16.4) | –13.3 | 59       | –22.32 (19.0) | –12.3 |
|        | No change | 101      | –4.9 (12.0)  |       | 67       | –7.6 (14.5)  |       | 48       | –10.0 (13.6)  |       |
|        | Worsened  | 26       | 1.7 (13.7)   | 6.6   | 41       | 1.8 (15.1)   | 9.4   | 58       | 1.4 (17.5)    | 11.4  |
| INT    | Improved  | 69       | –20.1 (21.7) | –13.1 | 67       | –25.7 (22.4) | –13.8 | 59       | –27.9 (20.4)  | –9.7  |
|        | No change | 101      | –7.0 (22.4)  |       | 67       | –11.9 (18.1) |       | 48       | –18.2 (22.6)  |       |
|        | Worsened  | 26       | –5.0 (22.8)  | 2.0   | 41       | 3.7 (21.3)   | 15.5  | 58       | –2.5 (23.2)   | 15.7  |
| SOC    | Improved  | 69       | –20.7 (25.1) | –16.6 | 67       | –25.9 (22.2) | –16.1 | 59       | –23.1 (25.5)  | –13.0 |
|        | No change | 101      | –4.2 (18.3)  |       | 67       | –9.8 (23.7)  |       | 48       | –10.1 (20.2)  |       |
|        | Worsened  | 26       | 3.7 (22.8)   | 7.9   | 41       | 0.7 (23.2)   | 10.5  | 58       | –0.6 (22.0)   | 9.6   |
| COG    | Improved  | 69       | –12.2 (21.8) | –7.4  | 67       | –15.5 (20.4) | –10.7 | 59       | –19.9 (26.4)  | –13.2 |
|        | No change | 101      | –4.8 (21.6)  |       | 67       | –4.8 (19.5)  |       | 48       | –6.7 (15.4)   |       |
|        | Worsened  | 26       | 2.8 (20.2)   | 7.6   | 41       | 2.8 (20.0)   | 7.7   | 58       | 3.6 (24.5)    | 10.3  |
| SLP    | Improved  | 69       | –17.3 (29.3) | –12.5 | 67       | –22.3 (30.1) | –15.6 | 59       | –24.7 (28.8)  | –12.4 |

|     |           |     |              |       |    |              |       |    |              |       |
|-----|-----------|-----|--------------|-------|----|--------------|-------|----|--------------|-------|
|     | No change | 101 | -4.8 (22.1)  |       | 67 | -6.7 (25.7)  |       | 48 | -12.4 (26.1) |       |
|     | Worsened  | 26  | 0.1 (18.0)   | 4.9   | 41 | 3.2 (18.7)   | 9.8   | 58 | 2.5 (24.6)   | 14.9  |
| AUD | Improved  | 69  | -10.1 (21.3) | -13.1 | 67 | -8.8 (24.7)  | -5.4  | 59 | -4.1 (28.5)  | -1.6  |
|     | No change | 101 | 2.9 (23.7)   |       | 67 | -3.4 (18.8)  |       | 48 | -2.5 (17.5)  |       |
|     | Worsened  | 26  | 2.2 (25.4)   | -0.8  | 41 | 12.2 (23.4)  | 15.6  | 58 | 14.1 (26.9)  | 16.6  |
| REL | Improved  | 69  | -22.8 (25.2) | -15.7 | 67 | -24.4 (28.9) | -14.5 | 59 | -26.2 (31.0) | -13.1 |
|     | No change | 101 | -7.1 (23.5)  |       | 67 | -9.9 (21.7)  |       | 48 | -13.1 (24.8) |       |
|     | Worsened  | 26  | 2.4 (22.7)   | 9.5   | 41 | -1.5 (24.2)  | 8.4   | 58 | -0.2 (24.5)  | 12.8  |
| QOL | Improved  | 69  | -15.5 (19.3) | -12.0 | 67 | -14.3 (21.6) | -8.2  | 59 | -16.7 (23.7) | -12.3 |
|     | No change | 101 | -3.5 (19.3)  |       | 67 | -6.1 (20.6)  |       | 48 | -4.4 (17.6)  |       |
|     | Worsened  | 26  | 6.0 (21.3)   | 9.5   | 41 | 4.9 (24.0)   | 11.0  | 58 | 6.0 (21.2)   | 10.4  |
| EMO | Improved  | 69  | -17.1 (22.1) | -12.1 | 67 | -22.6 (24.9) | -17.3 | 59 | -19.9 (23.9) | -10.2 |
|     | No change | 101 | -5.1 (17.6)  |       | 67 | -5.3 (18.8)  |       | 48 | -9.7 (22.5)  |       |
|     | Worsened  | 26  | 1.7 (20.1)   | 6.7   | 41 | 0.1 (24.3)   | 5.4   | 58 | -1.3 (23.2)  | 8.4   |

T1 = 3mth follow-up, T2 = 6mth follow-up, T3 = 9mth follow-up; CGI-3: Clinical Global Impression collapsed to three categories: 'improved', 'no change', 'worsened'; SD = Standard deviation.

**Table S3.** Spearman's Rho correlations between the TFI, TFI-22 global and subscale score and the Clinical Global Impression (CGI) categories.

|           |        | T0-T1        |              | T0-T2        |              | T0-T3        |              |
|-----------|--------|--------------|--------------|--------------|--------------|--------------|--------------|
|           |        | CGI-7        | CGI-3        | CGI-7        | CGI-3        | CGI-7        | CGI-3        |
| Global    | TFI    | <b>-0.44</b> | <b>-0.45</b> | <b>-0.54</b> | <b>-0.51</b> | <b>-0.53</b> | <b>-0.48</b> |
|           | TFI-22 | <b>-0.41</b> | <b>-0.45</b> | <b>-0.53</b> | <b>-0.50</b> | <b>-0.54</b> | <b>-0.50</b> |
| Subscales | INT    | -0.30        | -0.33        | <b>-0.50</b> | <b>-0.48</b> | <b>-0.54</b> | <b>-0.49</b> |
|           | SOC    | -0.33        | -0.36        | <b>-0.49</b> | <b>-0.47</b> | <b>-0.43</b> | -0.39        |
|           | COG    | -0.21        | -0.22        | -0.34        | -0.32        | -0.38        | -0.37        |
|           | SLP    | -0.27        | -0.29        | <b>-0.42</b> | -0.39        | <b>-0.46</b> | <b>-0.42</b> |
|           | AUD    | -0.18        | -0.22        | -0.38        | -0.33        | -0.37        | -0.31        |
|           | REL    | -0.31        | -0.33        | -0.36        | -0.34        | <b>-0.40</b> | -0.38        |
|           | QOL    | -0.29        | -0.33        | -0.33        | -0.29        | <b>-0.44</b> | <b>-0.40</b> |
|           | EMO    | -0.27        | -0.30        | <b>-0.40</b> | -0.38        | -0.35        | -0.31        |

CGI-7: Clinical Global Impression categories: 'much improved', 'moderately improved', 'slightly improved', 'no change', 'slightly worse', 'moderately worse', 'much worse'; CGI-3: Clinical Global Impression collapsed to three categories: 'improved', 'no change', 'worsened'. Values presented in bold indicate correlations that meet the recommended criteria (Spearman's Rho <0.4).

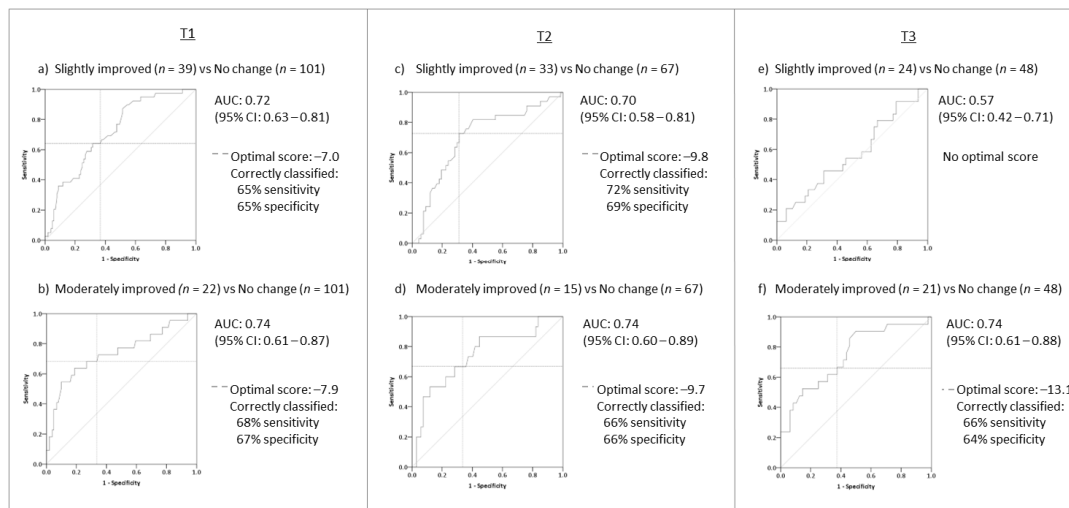

**Figure S1.** Receiver Operating Characteristic (ROC) curves with optimal values for identifying ‘improvements’ above ‘no change’ using the TFI-22 global change scores. a,c,e) = patients who reported ‘slight improvements’ with those who reported ‘no change’ in their tinnitus for T1 (3 mths), T2 (6 mths), and T3 (9 mths); (b,d,f) = patients who reported ‘moderate improvements’ with those who reported ‘no change’ in their tinnitus for T1 (3 mths), T2 (6 mths), and T3 (9 mths); solid light grey line indicates 50% probability of correctly classifying improvement. AUC = Area Under the Curve.

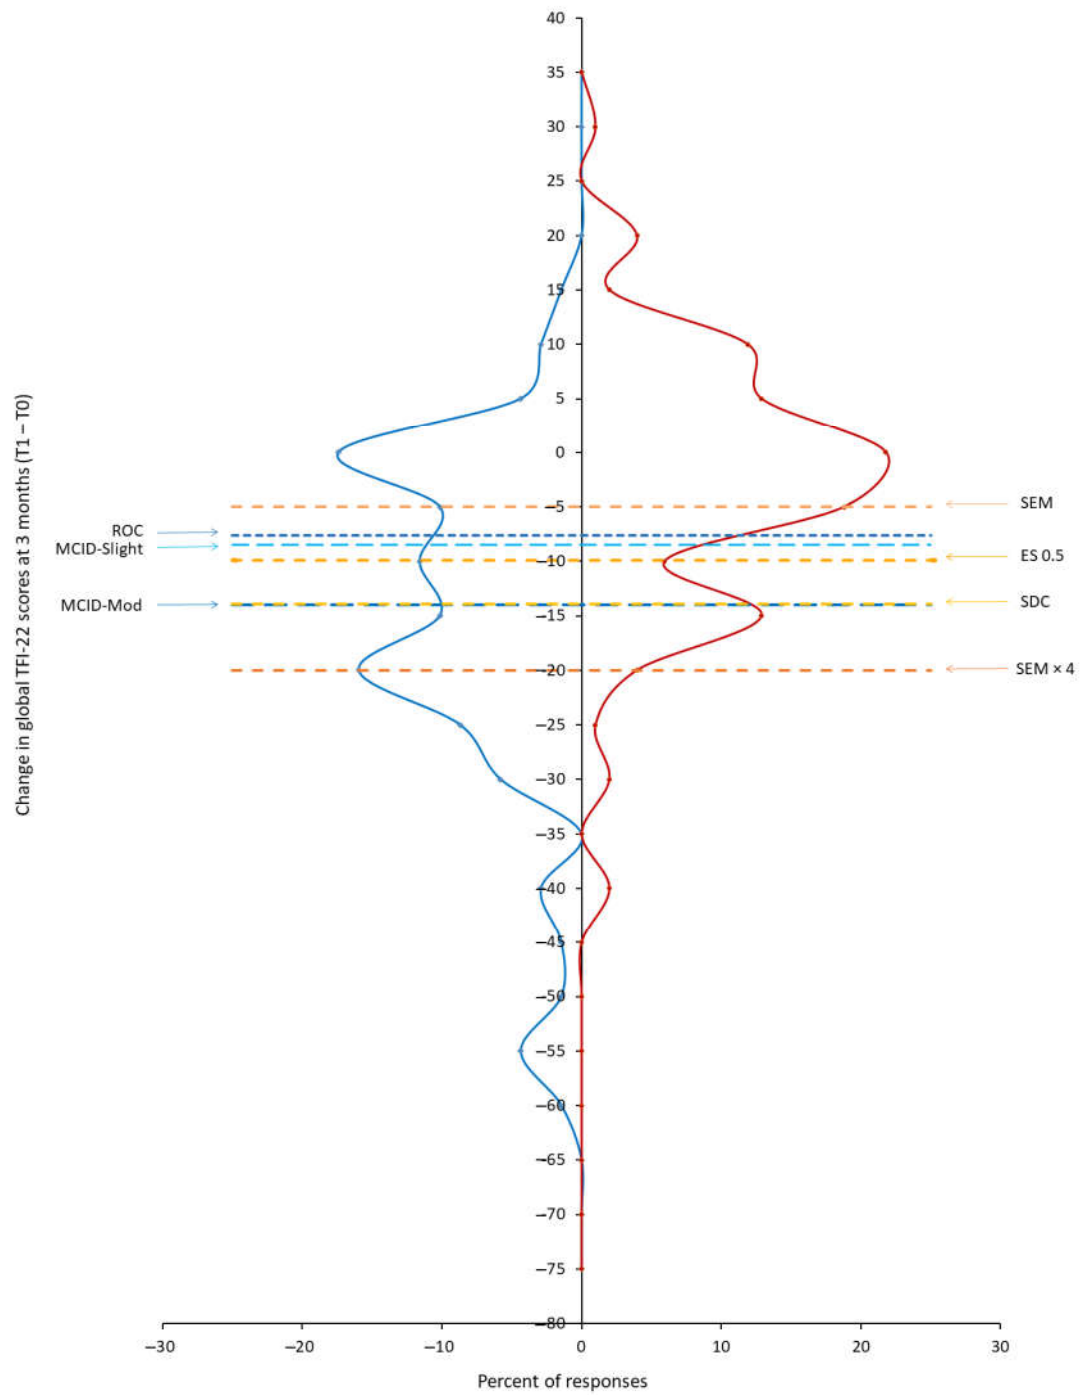

**Figure S2.** Distributions (expressed in percent) of the changes in the TFI-22 global scores for tinnitus patients who reported improvements in tinnitus (blue distribution line) and those who reported no change in tinnitus at 3 months from baseline (red distribution line).
